# Supplementary material for: PBR1 selectively controls biogenesis of photosynthetic complexes by modulating translation of the large chloroplast gene Ycf1 in Arabidopsis
Source: PubMed Central journal article supplement (PMC4870678; doi:10.1038/celldisc.2016.3), 2016-05-10
Supplement: celldisc20163-s2.pdf [file celldisc20163-s2.pdf]

**Figure S2**

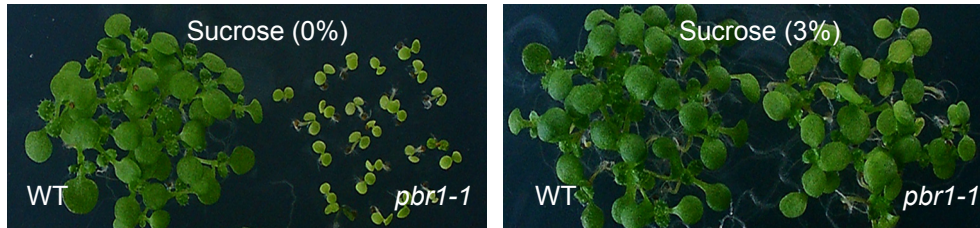

**Figure S2** Supplementation of sucrose rescues growth defects of *pbr1-1*. Phenotypes of 10-d-old seedlings of the wild-type, *pbr1-1* seedlings grown on  $\frac{1}{2}$  MS medium supplemented with 3% or without sucrose.
