# Supplementary material for: PBR1 selectively controls biogenesis of photosynthetic complexes by modulating translation of the large chloroplast gene Ycf1 in Arabidopsis
Source: PubMed Central journal article supplement (PMC4870678; doi:10.1038/celldisc.2016.3), 2016-05-10
Supplement: celldisc20163-s4.pdf [file celldisc20163-s4.pdf]

**Figure S4**

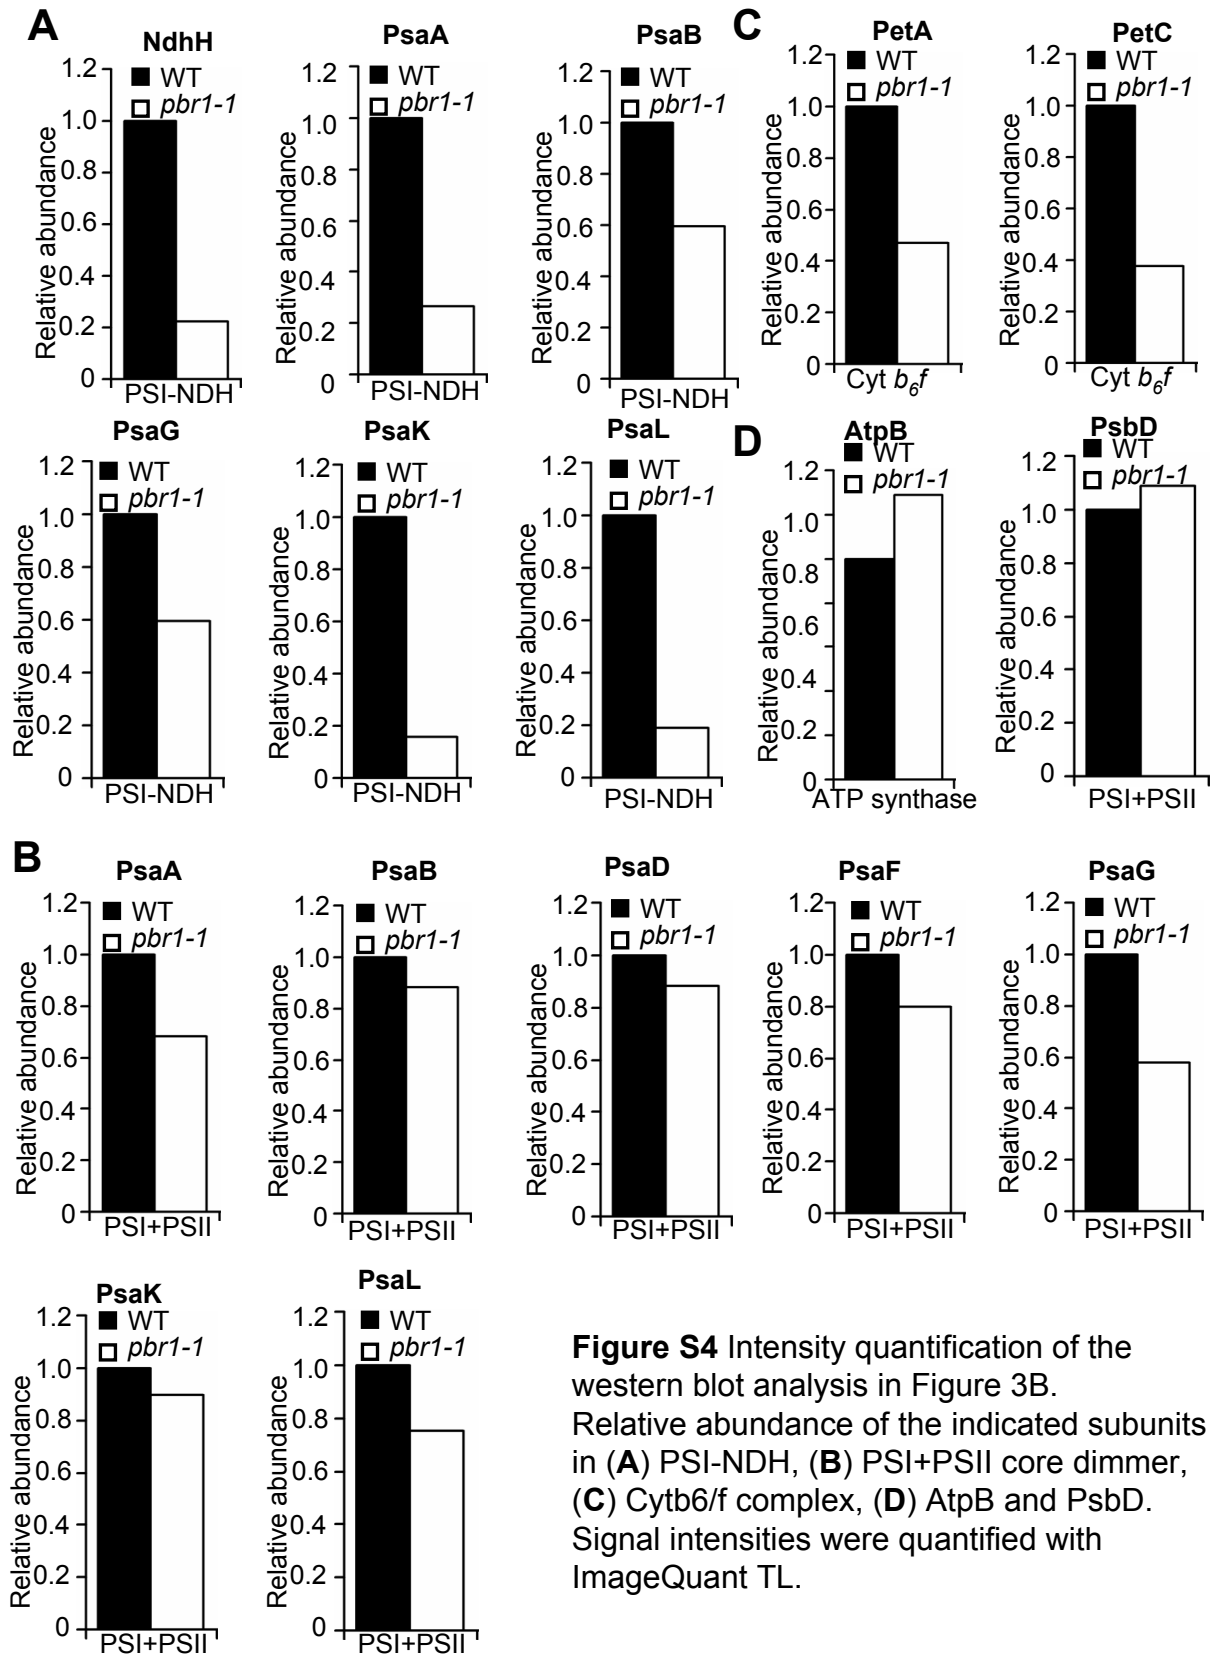

**Figure S4** Intensity quantification of the western blot analysis in Figure 3B. Relative abundance of the indicated subunits in (A) PSI-NDH, (B) PSI+PSII core dimer, (C) Cytb<sub>6</sub>/f complex, (D) AtpB and PsbD. Signal intensities were quantified with ImageQuant TL.
