# Supplementary material for: PBR1 selectively controls biogenesis of photosynthetic complexes by modulating translation of the large chloroplast gene Ycf1 in Arabidopsis
Source: PubMed Central journal article supplement (PMC4870678; doi:10.1038/celldisc.2016.3), 2016-05-10
Supplement: celldisc20163-s9.pdf [file celldisc20163-s9.pdf]

**Figure S9**

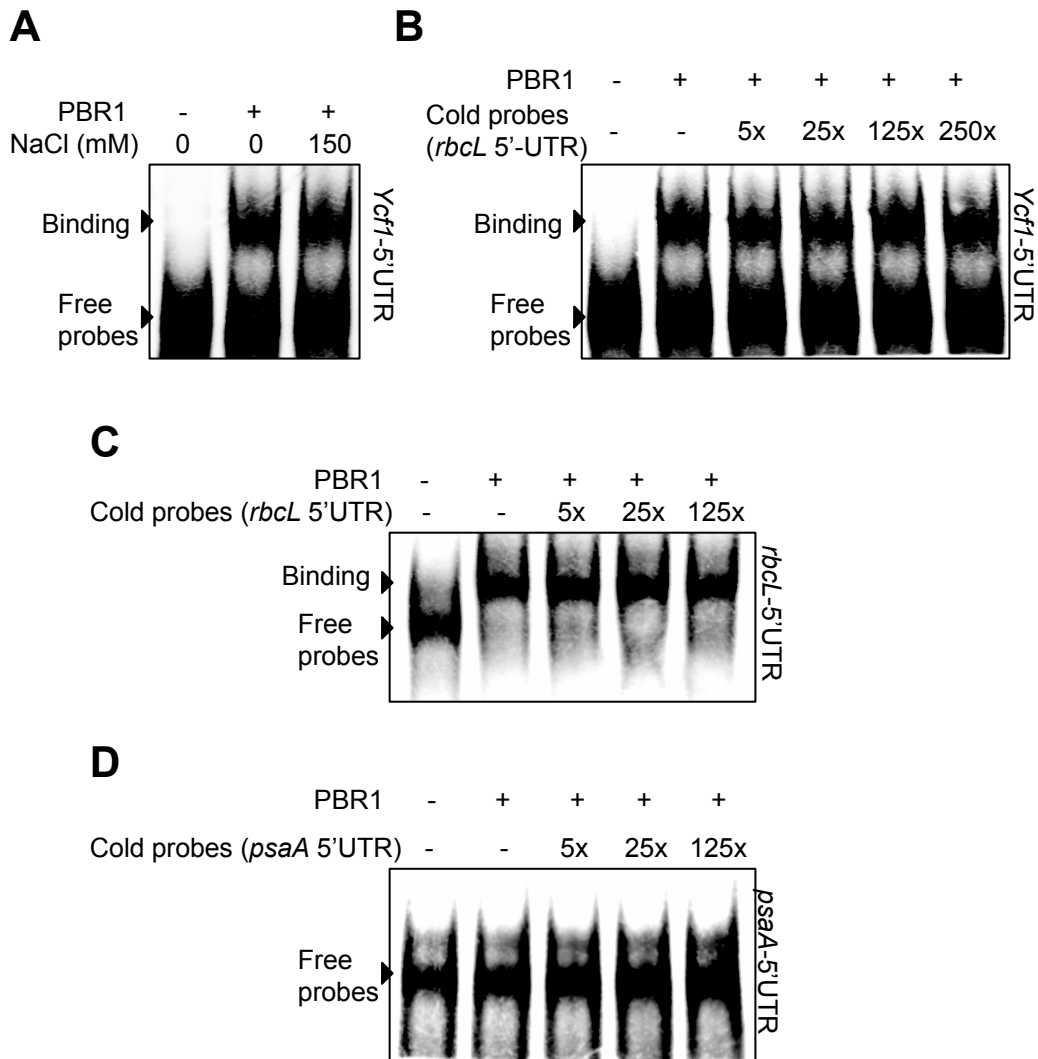

**Figure S9** Binding specificity of PBR1 to 5'-UTR regions of the *Ycf1*, *rbcl* and *psaA* transcripts.

(A) Effect of high concentration of NaCl (150 mM) on the binding activity of PBR1 to 5'-UTR of the *Ycf1* mRNA.

(B) Binding activity of PBR1 to 5'-UTR of the *Ycf1* mRNA in the presence of increasing amounts of unlabelled 5'-UTR of *rbcl* mRNA as a cold oligonucleotide competitor.

(C) Binding activity of PBR1 to 5'-UTR of the *rbcl* mRNA in the presence of increasing amounts of unlabelled 5'-UTR of *rbcl* mRNA as a cold oligonucleotide competitor.

(D) Binding activity of PBR1 to 5'-UTR of the *psaA* mRNA in the presence of increasing amounts of unlabelled 5'-UTR of *psaA* mRNA as a cold oligonucleotide competitor.
