# Supplementary material for: PBR1 selectively controls biogenesis of photosynthetic complexes by modulating translation of the large chloroplast gene Ycf1 in Arabidopsis
Source: PubMed Central journal article supplement (PMC4870678; doi:10.1038/celldisc.2016.3), 2016-05-10
Supplement: celldisc20163-s10.pdf [file celldisc20163-s10.pdf]

**Figure S10**

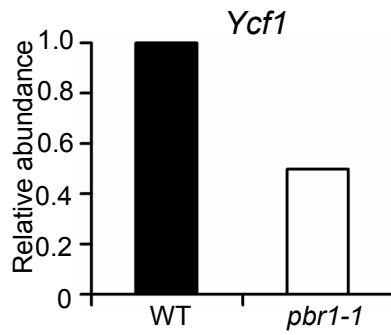

**Figure 10** Quantification of the signal intensities for the northern blot analysis as shown in Figure 6C.

The signal intensities of Lane 9 from wild type and the *pbr1-1* mutant were quantified respectively with ImageQuant TL.
