# Supplementary material for: PBR1 selectively controls biogenesis of photosynthetic complexes by modulating translation of the large chloroplast gene Ycf1 in Arabidopsis
Source: PubMed Central journal article supplement (PMC4870678; doi:10.1038/celldisc.2016.3), 2016-05-10
Supplement: celldisc20163-s11.pdf [file celldisc20163-s11.pdf]

**Figure S11**

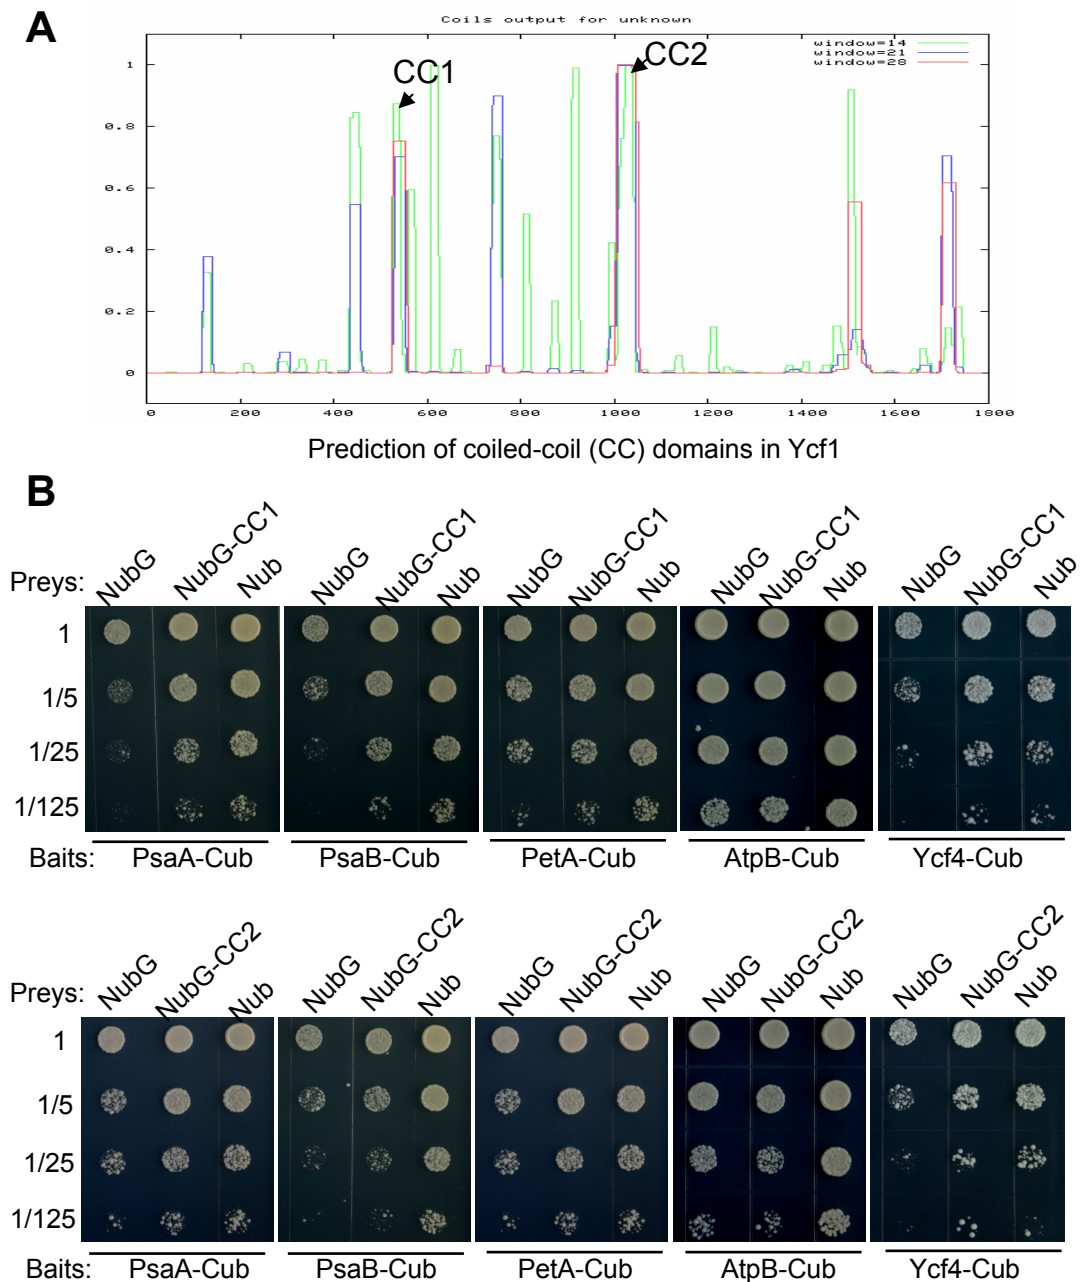

**Figure S11** Coiled-coil domains of Ycf1 interact with subunits of PSI and *Cytb<sub>6</sub>f* complexes and a thylakoid protein Ycf4 in a split-ubiquitin yeast two-hybrid (SUY2H) system.

(A) Two coiled-coil domains, designated as CC1 and CC2, in Ycf1 predicted by COILS program ([http://www.ch.embnet.org/software/COILS\\_form.html](http://www.ch.embnet.org/software/COILS_form.html))

(B) Interaction of coiled-coil domains (CC1 and CC2) of Ycf1 with the indicated subunits of PSI and *Cytb<sub>6</sub>f* complexes and Ycf4. Yeast cells cotransformed with Cub-the indicated subunit or -Ycf4 as baits and NubG, NubG-CC1 or -CC2, and Nub as preys grown on stringent media lacking His, Leu, and Trp with a dilution series (1/5, 1/25, 1/125).
