# Supplementary material for: PBR1 selectively controls biogenesis of photosynthetic complexes by modulating translation of the large chloroplast gene Ycf1 in Arabidopsis
Source: PubMed Central journal article supplement (PMC4870678; doi:10.1038/celldisc.2016.3), 2016-05-10
Supplement: celldisc20163-s12.pdf [file celldisc20163-s12.pdf]

**Table S1**

**Table S1** The difference in translation of the proteins identified in the corresponding PSI-NDH supercomplex band between the *pbr1-1* mutant and wild-type or *PBR1*-overexpression line OE-5 and wild-type

| AGI Code                                                            | Gene Name | Ratio<br><i>pbr1-1</i> /WT | Unique<br>Peptides | Coverage [%] | Ratio<br>OE-5/WT | Unique<br>Peptides | Coverage [%] |
|---------------------------------------------------------------------|-----------|----------------------------|--------------------|--------------|------------------|--------------------|--------------|
| <b>Identified PSI-NDH subunit proteins encoded by nuclear genes</b> |           |                            |                    |              |                  |                    |              |
| AT1G14150                                                           | PsbQ-F1   | 2.1176                     | 7                  | 34.2         | 1.2438           | 4                  | 18.4         |
| AT1G15980                                                           | NDF1      | 1.6427                     | 17                 | 35.1         | 1.2134           | 10                 | 21.9         |
| AT1G18730                                                           | NDF6      | 1.5555                     | 5                  | 21.7         | 2.5532           | 2                  | 11.4         |
| AT1G19150                                                           | Lhca6     | 0.3608                     | 4                  | 9.6          | 0.4359           | 1                  | 3.7          |
| AT1G30380                                                           | PsaK      | 0.3673                     | 2                  | 7.7          | 0.0398           | 2                  | 7.7          |
| AT1G31330                                                           | PsaF      | 1.921                      | 8                  | 35.7         | 1.2832           | 7                  | 33           |
| AT1G45474                                                           | Lhca5     | 3.4272                     | 6                  | 21.1         | 0.4138           | 4                  | 18.4         |
| AT1G52230                                                           | PsaH-2    | 0.4876                     | 2                  | 15.9         | 0.0488           | 3                  | 15.2         |
| AT1G55670                                                           | PsaG      | 5.164                      | 8                  | 21.9         | 2.2422           | 4                  | 16.9         |
| AT1G61520                                                           | Lhca3     | 6.2555                     | 4                  | 20.5         |                  |                    |              |
| AT1G64770                                                           | NDF2      | 0.5035                     | 17                 | 37.1         | 0.5424           | 12                 | 27.3         |
| AT1G74880                                                           | NdhO      | 0.1412                     | 7                  | 43.7         | 0.4279           | 2                  | 12.7         |
| AT2G39470                                                           | PPL2      | 3.7902                     | 15                 | 52.9         | 1.3057           | 8                  | 26.5         |
| AT3G01440                                                           | PsbQ-F2   | 0.3476                     | 8                  | 23.2         | 1.0504           | 6                  | 20           |
| AT3G47470                                                           | Lhca4     | 4.3476                     | 2                  | 7.2          |                  |                    |              |
| AT3G54890                                                           | Lhca1     | 3.3844                     | 5                  | 14.5         | 2.6166           | 5                  | 13.3         |
| AT3G61470                                                           | Lhca2     | 1.78                       | 3                  | 12.5         |                  |                    |              |
| AT4G09350                                                           | NdhT      | 3.1433                     | 10                 | 32.5         | 9.9423           | 3                  | 14.9         |
| AT4G12800                                                           | PsaL      | 16.488                     | 4                  | 17.4         | 8.5056           | 4                  | 16.9         |
| AT4G28750                                                           | PsaE-1    | 1.1664                     | 4                  | 41.3         | 0.1629           | 4                  | 41.3         |
| AT4G37925                                                           | NdhM      | 1.5921                     | 6                  | 24.4         |                  |                    |              |
| AT4G39710                                                           | FKBP16-2  | 2.2123                     | 7                  | 33.2         | 1.5079           | 5                  | 19.8         |
| AT5G13120                                                           | CYP20-2   | 2.7223                     | 14                 | 42.5         | 2.3783           | 5                  | 18.1         |
| AT5G21430                                                           | NdhU      | 1.242                      | 13                 | 55.5         | 1.1125           | 8                  | 34.4         |
| AT5G58260                                                           | NdhN      | 1.4588                     | 6                  | 31.6         | 0.5906           | 5                  | 26.3         |
| <b>Identified proteins encoded by chloroplast DNA</b>               |           |                            |                    |              |                  |                    |              |
| ATCG00020                                                           | PsbA      | 0.6125                     | 7                  | 19.8         | 0.7286           | 6                  | 18.7         |
| ATCG00120                                                           | AtpA      | 1.3368                     | 7                  | 17.6         | 0.0584           | 2                  | 4.9          |
| ATCG00130                                                           | AtpF      | 1.2696                     | 4                  | 24.5         |                  |                    |              |
| ATCG00170                                                           | RpoC2     | 1.4241                     | 56                 | 39.5         |                  |                    |              |
| ATCG00180                                                           | RpoC1     | 2.6362                     | 25                 | 35.3         |                  |                    |              |

**Table S1 (continued)**

| AGI Code  | Gene Name | Ratio<br><i>pbr1-1</i> /WT | Unique<br>Peptides | Coverage [%] | Ratio<br>OE-5/WT | Unique<br>Peptides | Coverage [%] |
|-----------|-----------|----------------------------|--------------------|--------------|------------------|--------------------|--------------|
| ATCG00190 | RpoB      | 0.9711                     | 29                 | 25.7         |                  |                    |              |
| ATCG00270 | PsbD      | 1.5595                     | 5                  | 20.4         | 1.0647           | 4                  | 14.2         |
| ATCG00280 | PsbC      | 1.251                      | 13                 | 25.4         | 0.5578           | 8                  | 15           |
| ATCG00330 | Rps14     | 2.9414                     | 6                  | 47           |                  |                    |              |
| ATCG00340 | PsaB      | 4.9407                     | 10                 | 11.6         | 1.4964           | 8                  | 11.2         |
| ATCG00350 | PsaA      | 2.0651                     | 17                 | 14.5         | 1.0629           | 13                 | 14.9         |
| ATCG00420 | NdhJ      | 8.058                      | 5                  | 36.1         | 0.063            | 1                  | 4.4          |
| ATCG00430 | NdhK      | 2.8802                     | 6                  | 23.1         | 0.5334           | 4                  | 15.1         |
| ATCG00480 | AtpB      | 0.9158                     | 11                 | 27.7         | 0.4022           | 2                  | 5.4          |
| ATCG00490 | RbcL      | 1.5489                     | 10                 | 19.8         |                  |                    |              |
| ATCG00500 | AccD      | 1.2878                     | 20                 | 34.8         | 0.6084           | 2                  | 4.5          |
| ATCG00520 | Ycf4      | 2.5691                     | 2                  | 9.2          |                  |                    |              |
| ATCG00540 | PetA      | 0.5267                     | 2                  | 5.3          |                  |                    |              |
| ATCG00560 | PsbL      | 4.1081                     | 1                  | 36.8         | 1.4518           | 1                  | 36.8         |
| ATCG00570 | PsbF      | 2.4309                     | 1                  | 20.5         | 0.8159           | 1                  | 20.5         |
| ATCG00580 | PsbE      | 2.1875                     | 3                  | 36.1         | 0.6369           | 3                  | 36.1         |
| ATCG00660 | Rpl20     | 0.5377                     | 9                  | 33.3         |                  |                    |              |
| ATCG00680 | PsbB      | 3.0059                     | 18                 | 26.6         | 1.7838           | 6                  | 9.6          |
| ATCG00710 | PsbH      | 1.9102                     | 3                  | 37           | 0.6031           | 2                  | 28.8         |
| ATCG00740 | RpoA      | 1.2885                     | 11                 | 27.1         |                  |                    |              |
| ATCG00770 | Rps8      | 0.8584                     | 4                  | 26.1         |                  |                    |              |
| ATCG00790 | Rpl16     | 0.2778                     | 5                  | 37.8         |                  |                    |              |
| ATCG00800 | Rps3      | 1.2406                     | 17                 | 43.6         |                  |                    |              |
| ATCG00860 | Ycf2      | 1.1399                     | 27                 | 12.6         |                  |                    |              |
| ATCG00890 | NdhB      | 1.3112                     | 3                  | 6.4          |                  |                    |              |
| ATCG00900 | Rps7      | 0.1823                     | 8                  | 40.6         |                  |                    |              |
| ATCG01010 | NdhF      | 7.9428                     | 11                 | 12.7         | 0.9471           | 6                  | 6.8          |
| ATCG01050 | NdhD      | 1.2344                     | 4                  | 9.4          | 1.6428           | 3                  | 6.2          |
| ATCG01090 | NdhI      | 1.8408                     | 6                  | 33.7         | 1.8149           | 6                  | 34.9         |
| ATCG01100 | NdhA      | 1.0884                     | 3                  | 5.6          | 1.9675           | 3                  | 6.7          |
| ATCG01110 | NdhH      | 1.2405                     | 14                 | 26.2         | 0.9328           | 8                  | 16.5         |
| ATCG01130 | Ycf1      | 0.3408                     | 39                 | 19.1         | 1.54             | 7                  | 3.8          |

\*For comparative analysis, the leaves of wild-type and *pbr1-1* or overexpression line of *PBR1* (OE-5) were pulse-labeled with 200 mg/L  $^{13}\text{C}_6$   $^{15}\text{N}_4$  L-Arginine (“heavy”, H) and  $^{15}\text{N}_4$  L-Arginine (“medium heavy”, M), respectively. Gel slices corresponding to NDH-PSI supercomplex were excised and extracted peptides were analyzed by LC-MS/MS on a high performance mass spectrometer (LTQ-Orbitrap XL, Thermo Finnigan, San Jose, CA). The ratio of peak intensities of M versus H peptides reflects difference in translation of the corresponding proteins since the newly synthesized proteins incorporate either the M or H amino acids.
