# Supplementary material for: PBR1 selectively controls biogenesis of photosynthetic complexes by modulating translation of the large chloroplast gene Ycf1 in Arabidopsis
Source: PubMed Central journal article supplement (PMC4870678; doi:10.1038/celldisc.2016.3), 2016-05-10
Supplement: celldisc20163-s13.pdf [file celldisc20163-s13.pdf]

## Table S2

**Table S2** The primer sequences for constructions and gene expression analysis

| Primer Name                      | Sequence (5'-3')                          |
|----------------------------------|-------------------------------------------|
| <b>Primers for constructions</b> |                                           |
| GC-F                             | ACTGGATCCGTACACATTCTTGCCACGTGTTC          |
| GC-R                             | GAGCTGCAGTCGATTGCTGATTTTGATTCCGTG         |
| OE-F                             | TCAGTCGACATGCAAACGCTTCTCTGTCAG            |
| OE-R                             | TATCCCGGGTCACTGACTCTCGAACTTGAAC           |
| GUS-F                            | TCAAGCTTGTACACATTCTTGCCACGTGTTC           |
| GUS-R                            | ATGGATCCCTTTTTTCTCTTATCCGCCGCG            |
| YFP-F                            | GGATCCATGCAAACGCTTCTCTG                   |
| YFP-R                            | CTCGAGCTGACTCTCGAACTTGAAC                 |
| RC-F                             | CTGGATCCATGCAAACGCTTCTCTGTCAG             |
| RC-R                             | CTGAATTCTCACTGACTCTCGAACTTGAAC            |
| Ycf-A-F                          | CACAGTCGACGCTAGCATGGTTTTTCAATCTTTTATAC    |
| Ycf-A-R                          | CCCGGGTCTAGAAAGCTTCAATTCTATTTAAAAATTC     |
| Ycf-B-F                          | TTGAAGCTTTAGATAAGGAATGG                   |
| Ycf-B-R                          | TTTTCTAGAAAAGAAGAGACTAAAC                 |
| Ycf-C-F                          | TTTTCTAGAAAATATAATATTCGG                  |
| Ycf-C-R                          | CACACCCGGGTTAAGGAATTGGAAATCGCG            |
| RbcS-TP-F                        | CACAGCTAGCTTCGGAATCGGTAAGGTCAG            |
| RbcS-TP-R                        | CACAGTCGACATGGCTTCTCTATGCTCTC             |
| Ycf-5'UTR-F                      | TAATACGACTCACTATAGGGTATCCCTTTGGTGTCATTGAC |
| Ycf-5'UTR-R                      | GTCGACCACAAACCTCCCTTTTTTC                 |
| Ycf-3'UTR-F                      | TAATACGACTCACTATAGGGTCATAAATACTTTTTACTATA |
| Ycf-3'UTR-R                      | GTCGACATAATTGGTATCTATGTGATTG              |
| PsaA-5'UTR-F                     | TAATACGACTCACTATAGGGAATTCTAAGTATCTATCATC  |
| PsaA-5'UTR-R                     | GTCGACTGAGTCCTCCTCTTTCCGGAC               |
| RbcL-5'UTR-F                     | TAATACGACTCACTATAGGGTGATTAGTTGATAATTTTGTG |
| RbcL-5'UTR-R                     | GTCGACAAGTCCCTCCCTACAAGTCA                |
| Ycf1-CC1-Y2H-F                   | GAATTCGGATCCTGGATAAACAAGATTC              |
| Ycf1-CC1-Y2H-R                   | CTGCAGATTTTTTATAAGCGTTTGATC               |
| Ycf1-CC2-Y2H-F                   | GAATTCAAAAAAGATTCAATAATAAG                |
| Ycf1-CC2-Y2H-R                   | CTGCAGAAAAAAATGGATTTACGAA                 |
| PsaA-Y2H-F                       | CTGCAGATGATTATTCGTTCCGCCGGAAC             |
| PsaA-Y2H-R                       | CTCGAGTCCTACTGCAATAATTCTTGC               |
| PsaB-Y2H-F                       | CTGCAGATGGCATTAAAGATTTCCAAGG              |
| PsaB-Y2H-R                       | AAGCTTACCGAATTTGCCCGATGTGG                |
| PetA-Y2H-F                       | CTGCAGATGCAAAC TAGAAATACCTTT              |
| PetA-Y2H-R                       | AAGCTTAAAATTCATTTCCGATAATTG               |
| AtpB-Y2H-F                       | CTGCAGATGAGAACAAATCCTACTAC                |
| AtpB-Y2H-R                       | CTCGAGTTTCTTCAATTTACTCTCCA                |
| Ycf4-Y2H-F                       | CTGCAGATGAGTTGGCGATCAGAATC                |
| Ycf4-Y2H-R                       | CTCGAGAAATACTTCAATTGGTACAC                |

**Table S2 (continued)**

| Primer Name                                                   | Sequence (5'-3')         |
|---------------------------------------------------------------|--------------------------|
| <b>Primers for RT-PCR, qRT-PCR and northern blot analysis</b> |                          |
| ACTIN2-F                                                      | GCCATCCAAGCTGTTCTCTC     |
| ACTIN2-R                                                      | GCTCGTAGTCAACAGCAACAA    |
| PBR1-qRT-F                                                    | CTAAGAGAGATCTTGTCTGG     |
| PBR1-qRT-R                                                    | AGAAGAATTGGATCGGTGAGC    |
| Ycf1-qRT-F                                                    | GAAATGGAAGAAATCCGAGTG    |
| Ycf1-qRT-R                                                    | CGAAAACGAGAGTTACAAATGG   |
| Ycf1-Northern-F                                               | TCAAATGAAAAAGAATCCCTTC   |
| Ycf1-Northern-R                                               | TCGCAATTGAAAACGCGAATATC  |
| rbcL-Northern-F                                               | AACCAAGGATACTGATATCTTGGC |
| rbcL-Northern-R                                               | ATCGTCCTTTGTAACGATCAAGGC |
| psaA-Northern-F                                               | TCCTAAAGAAATACCGCTTCC    |
| psaA-Northern-R                                               | ATCCACATGTGATGTGTGAAC    |
